# Supplementary material for: Highly selective and sensitive colorimetric detection of Hg(ii) ions using green synthesized silver nanoparticles
Source: Royal Society of Chemistry journal article supplement (doi:10.1039/c5ra18106b), 2015-01-01

## Electronic Supplementary Information (ESI)

### **Highly selective and sensitive colorimetric detection of Hg (II) ions using green synthesized silver nanoparticles**

**M. Annadhasan and N. Rajendiran\***

*Department of Polymer Science, University of Madras, Guindy Campus, Chennai- 600 025, Tamil Nadu, India. E-mail: [nrajendiar@yahoo.com](mailto:nrajendiar@yahoo.com) (N. Rajendiran\*); Tel: +91-44-22202822.*

#### **Materials and Methods**

##### **1.1. Materials**

Silver nitrate ( $\text{AgNO}_3$ ) was purchased from Sigma Aldrich and used as received. *N*-Cholyl-L-cysteine was synthesized by adopting our previous method [22]. Salts of the different cations studied ( $\text{LiCl}$ ,  $\text{NaCl}$ ,  $\text{KCl}$ ,  $\text{MgCl}_2$ ,  $\text{CaCl}_2$ ,  $\text{BaCl}_2$ ,  $\text{ZnCl}_2$ ,  $\text{CoCl}_2$ ,  $\text{NiCl}_2$ ,  $\text{CdCl}_2$ ,  $\text{HgCl}_2$ ,  $\text{CuSO}_4$ ,  $\text{MnSO}_4$ ,  $\text{Pb}(\text{NO}_3)_2$ , and  $\text{Cr}(\text{NO}_3)_3$  were obtained from SRL chemicals Pvt. Ltd. (India) and used as received without further purification. The glass containers were washed with aqua-regia ( $\text{HCl}:\text{HNO}_3 = 3:1$  (v/v)) and rinsed with triple distilled water prior to use.

##### **1.2. Instruments**

UV-visible spectroscopy measurements were carried out on Techcomp UV- 2301 spectrophotometer. Dynamic light scattering (DLS) measurements were performed for colloidal solutions using Nanotracs Ultra NPA 253 from Microtrac, USA. High resolution transmission electron microscopy (HRTEM) images were recorded using a JEOL JEM 2100 equipped with a Gatan Imaging Filter operating at 200 kV. X-ray photoelectron spectroscopy (XPS) measurements were performed with Omicron Nanotechnology; GmbH, Germany XM1000-monochromator with Al  $\text{K}\alpha$  radiation of 1483 eV operated at 300 W (20 mA emission current, 15 kV) and a base pressure of  $5 \times 10^{-5}$  mbar. Powder X-ray diffraction of all samples

were recorded on SMART Bruker D8 Advance diffractometer using Cu K $\alpha$  Xradiation ( $\lambda = 1.54056 \text{ \AA}$ ) at 40 kV and 30 mA. Diffraction patterns were collected over a  $2\theta$  range of  $5\text{--}80^\circ$  at a scan rate of  $1^\circ \text{ min}^{-1}$ .

### ***1.3. Colorimetric Assay procedure***

In a typical procedure, 2ml of AgNPs solution was mixed with various metal ions at a fixed concentration and equilibrated for five minutes at room temperature before the spectral measurements. For specific detection limit various concentration of Hg $^{2+}$  ions were added and recorded the responses. UV-Vis absorption spectra were recorded using Techcomp UV-2301 spectrophotometer equipped with a 1cm path length quartz cell.

Fig. S1a <sup>1</sup>H and <sup>13</sup>CNMR spectra of *N*-cholyl-L-cysteine.

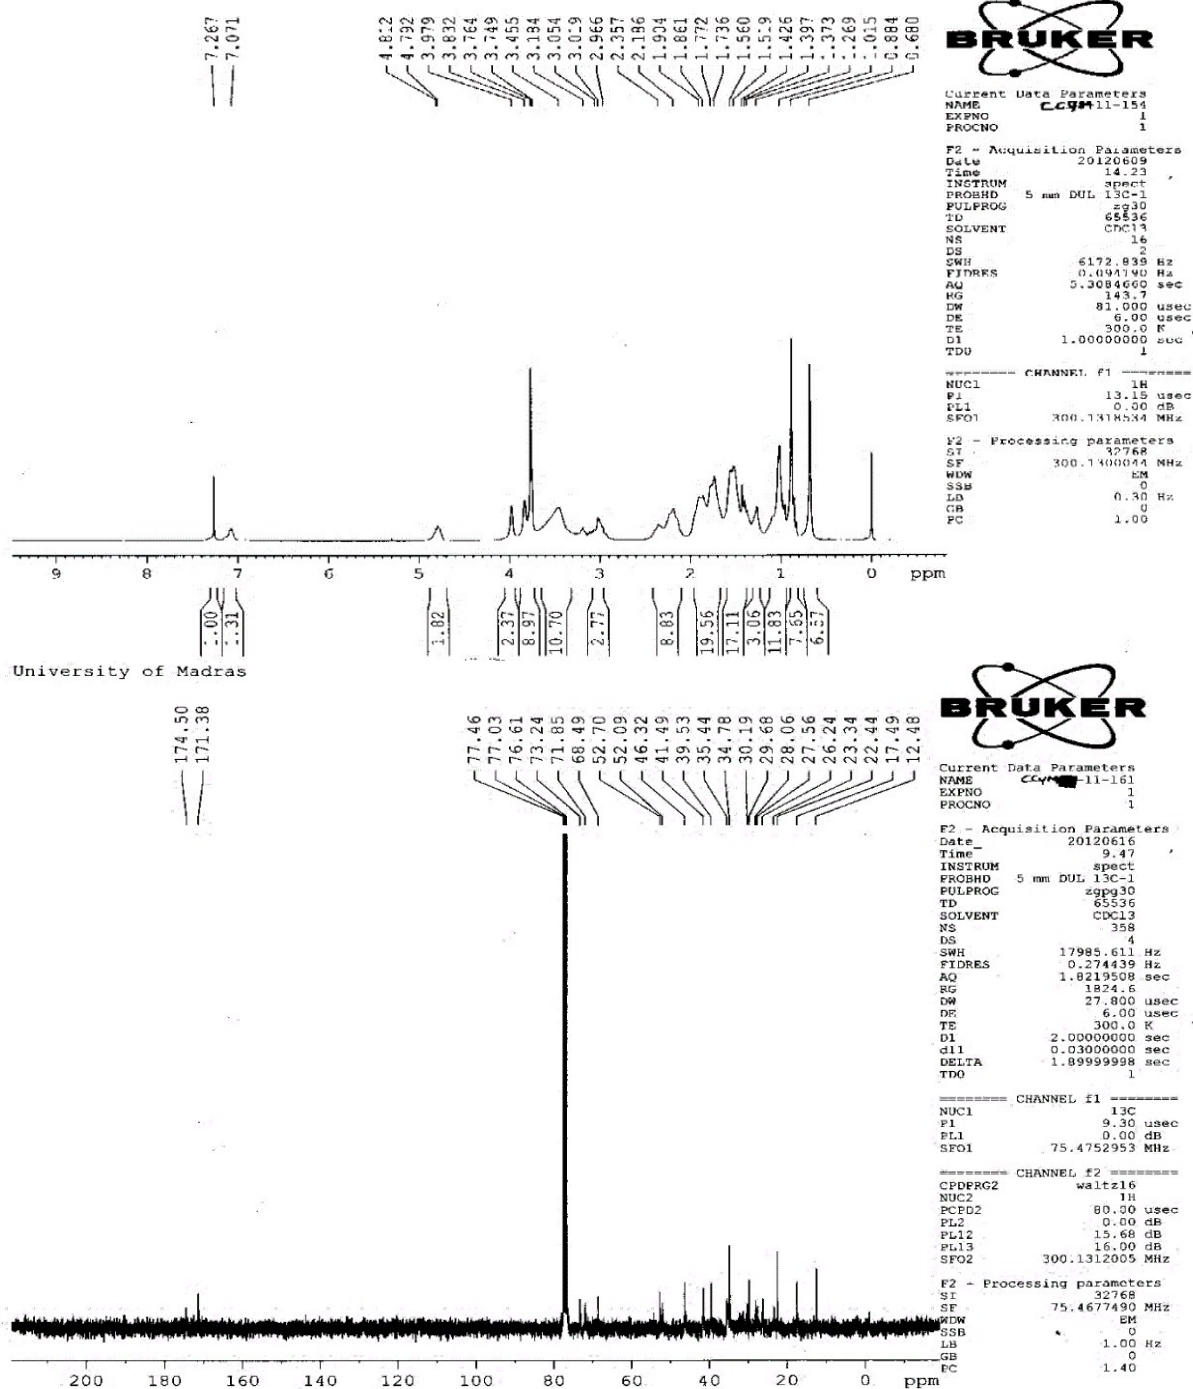

***N*-Cholyl-L-cysteine**

<sup>1</sup>H NMR (CDCl<sub>3</sub>/DMSO-d<sub>6</sub>) δ = 4.79 (d, 1H, C\*H), 3.97 (s, 1H, 12a-CH), 3.83 (s, 1H, 7a-CH), 3.45 (m, 1H, 3a-CH), 2.20-0.98 (m, 25H, aliphatic H), 1.01-0.68 (m, 9H, 3 CH<sub>3</sub>), 0.88 (s, 3H, 19-CH<sub>3</sub>), 0.68 (s, 3H, 18-CH<sub>3</sub>). IR (KBr): 3412, 2941, 2874, 2496, 1728, 1683, 1582, 1509.

**Fig. S1b** FT-IR spectra of pure NaCysC and NaCysC stabilized AgNPs.

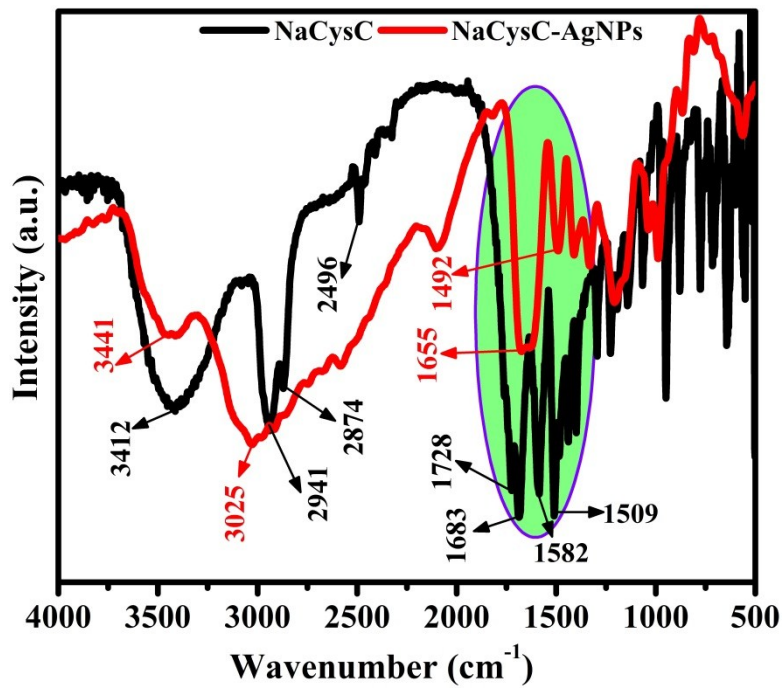

**Fig. S2** UV-visible spectra of synthesized AgNPs samples stability (fresh and after 6 months).

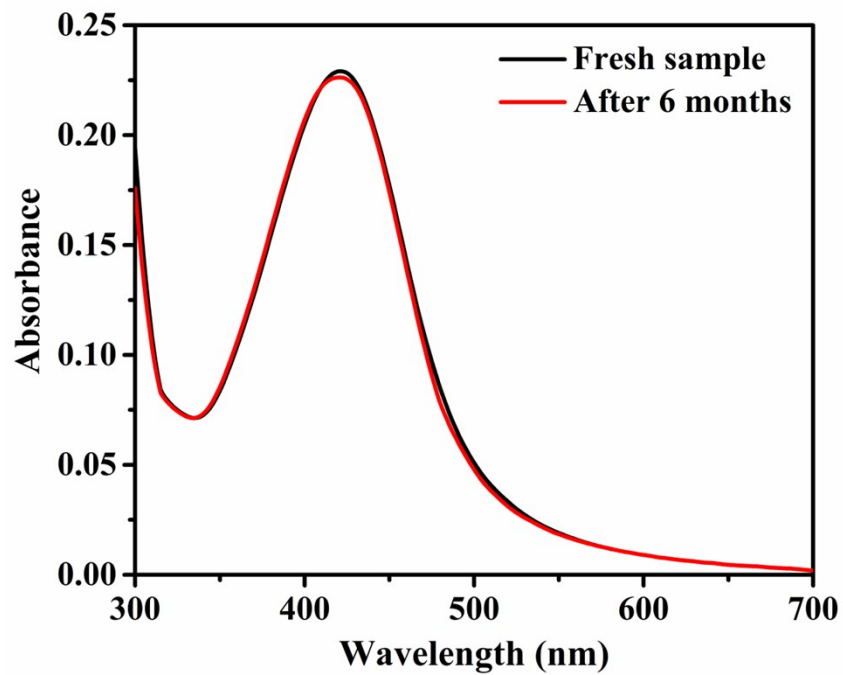

**Fig. S3** Powder-XRD spectrum of NaCysC stabilized AgNPs.

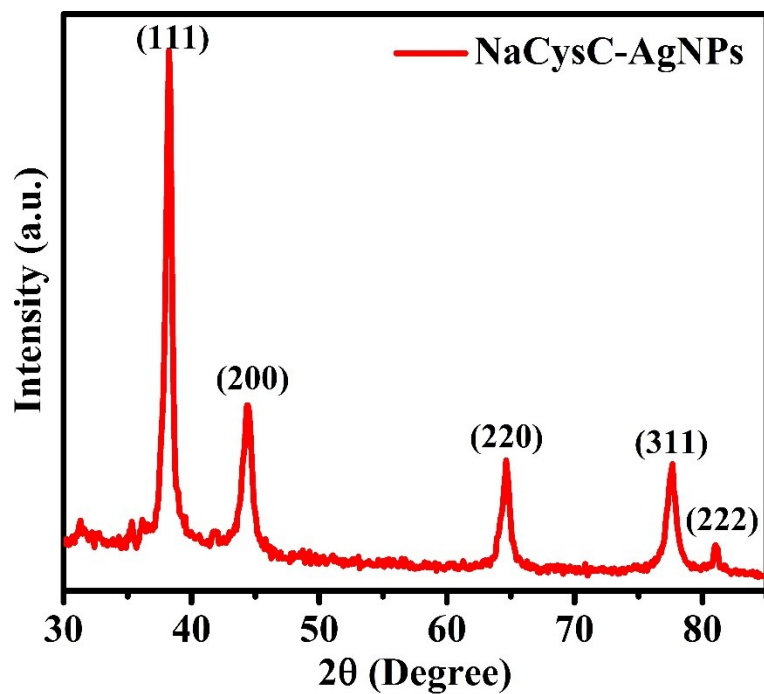

**Fig. S4** EDAX spectrum of NaCysC stabilized AgNPs.

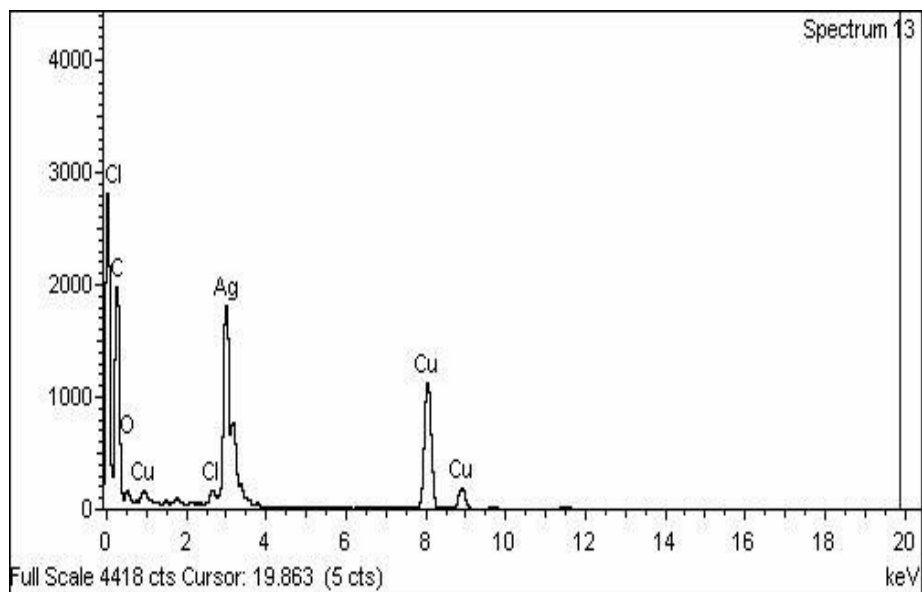

**Fig. S5** XPS survey spectrum (top left) and high resolution XPS spectra of components present in NaCysC stabilized AgNPs.

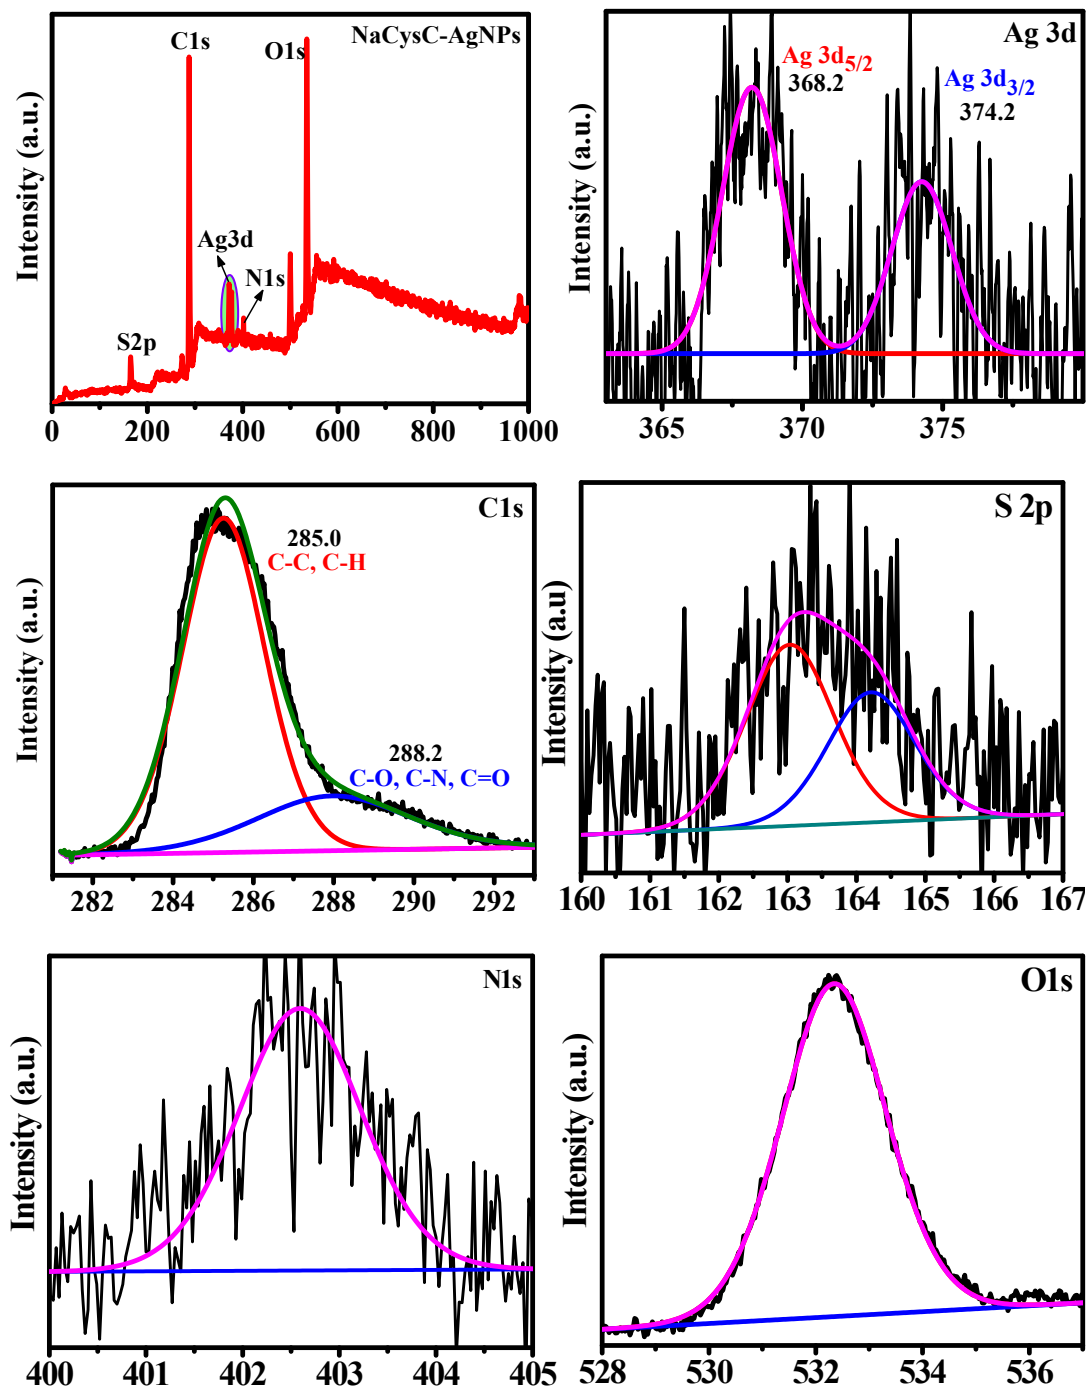

**Fig. S6** Plot of  $\text{Hg}^{2+}$  concentrations versus absorbance intensity of AgNPs solution.

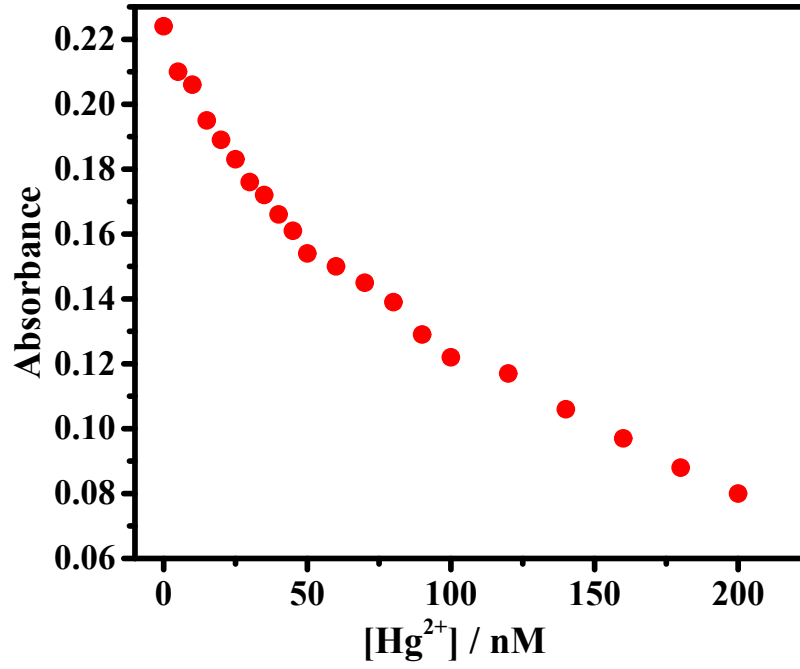

**Fig. S7a.**Plot of  $\text{Hg}^{2+}$  concentrations in real water samples versus absorbance intensity differences of AgNPs solution.

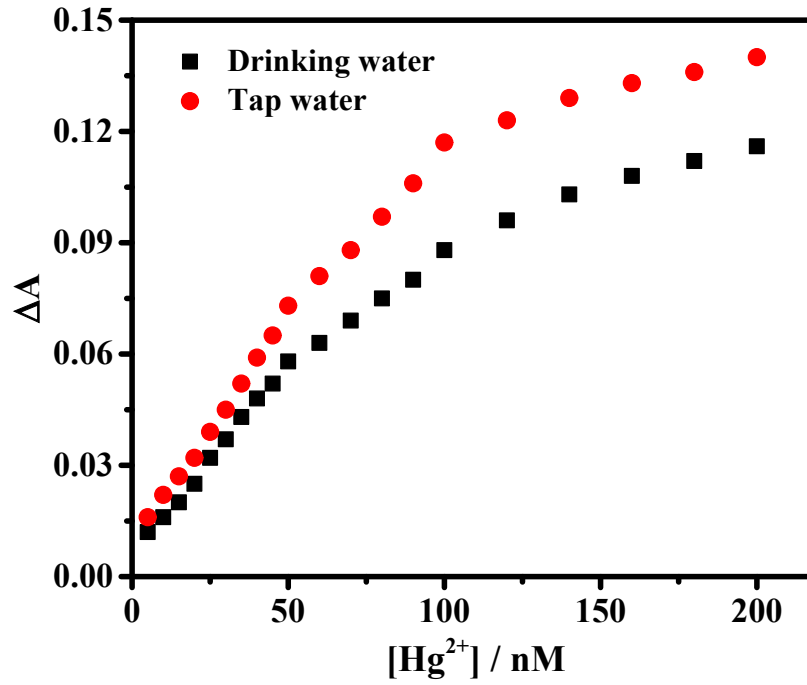

**Fig. S7b.** Linear plot for real water samples

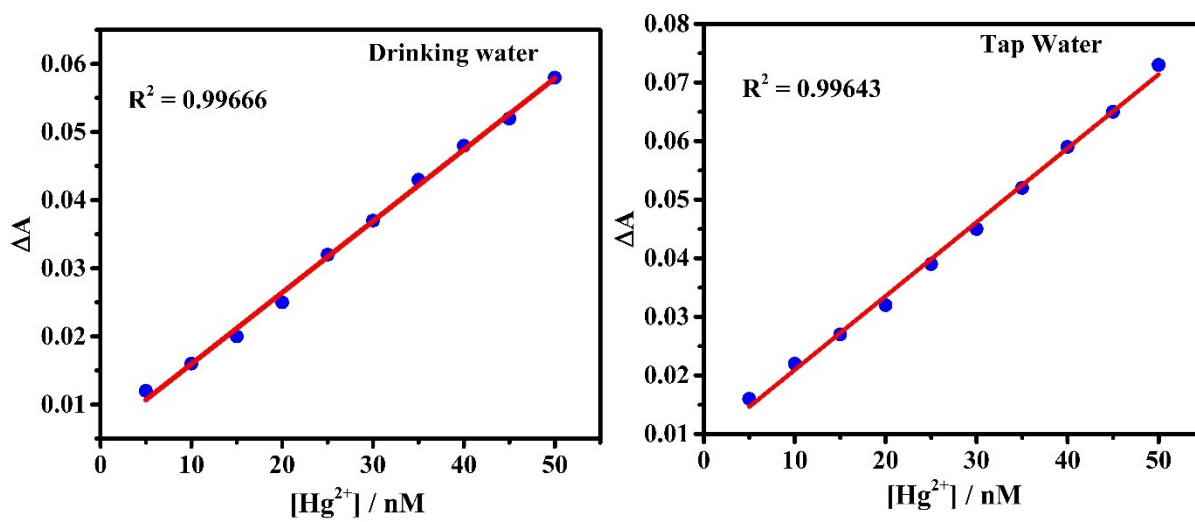

Supplement: c5ra18106b1.pdf [file c5ra18106b1.pdf]
